# Supplementary material for: The Maillard reaction end product Nε-carboxymethyllysine is metabolized in humans and the urinary levels of the microbial metabolites are associated with individual diet
Source: Royal Society of Chemistry journal article supplement (doi:10.1039/d2fo03480h), 2023-01-01
Supplement: d2fo03480h1.pdf [file d2fo03480h1.pdf]

## Supplementary information

### **The Maillard Reaction end product N $\epsilon$ -carboxymethyllysine is metabolized in humans and the urinary levels of the microbial metabolites are associated with individual diet**

Silvia Tagliamonte<sup>a</sup>, Antonio Dario Troise<sup>a, †</sup>, Rosalia Ferracane<sup>a</sup> and Paola Vitaglione<sup>a, b \*</sup>

<sup>a</sup> Department of Agricultural Sciences, University of Naples Federico II, 80055 Portici, Italy

<sup>b</sup> Task Force on Microbiome Studies, University of Naples Federico II, 80134 Naples, Italy

#### **\*Corresponding author:**

Prof Paola Vitaglione, PhD

Department of Agricultural Sciences, University of Naples "Federico II"

Parco Gussone Ed. 84, Portici (NA), 80055, Italy

Telephone: +39 081 2539357;

E-mail: [paola.vitaglione@unina.it](mailto:paola.vitaglione@unina.it)

<sup>†</sup>Present address: Proteomics, Metabolomics & Mass Spectrometry Laboratory, Institute for the Animal Production System in the Mediterranean Environment, National Research Council, 80055, Portici, Italy.

**Table S1.** Acquisition parameters used for the LC-MS/MS analysis of CML, pyrraline and CML metabolites

| <b>Compound</b>  | <b>Precursor ion<br/>[M+H]<sup>+</sup> m/z</b> | <b>Product ions<br/>[M+H]<sup>+</sup> m/z</b> | <b>CE</b> | <b>CXP</b> | <b>DP</b> |
|------------------|------------------------------------------------|-----------------------------------------------|-----------|------------|-----------|
| <b>CML</b>       | 205                                            | 84                                            | 29        | 5          | 40        |
|                  |                                                | 130                                           | 17        | 8          |           |
| <b>CML-d4</b>    | 209                                            | 88                                            | 29        | 5          | 40        |
|                  |                                                | 134                                           | 17        | 8          |           |
| <b>CM-APA</b>    | 176                                            | 84                                            | 20        | 15         | 40        |
|                  |                                                | 101                                           | 10        | 15         |           |
|                  |                                                | 112                                           | 10        | 15         |           |
| <b>CM-APO</b>    | 162                                            | 69                                            | 10        | 15         | 40        |
|                  |                                                | 98                                            | 10        | 15         |           |
|                  |                                                | 116                                           | 10        | 15         |           |
| <b>CM-CAD</b>    | 161                                            | 69                                            | 20        | 15         | 40        |
|                  |                                                | 86                                            | 10        | 15         |           |
|                  |                                                | 98                                            | 10        | 15         |           |
| <b>Lysine</b>    | 147                                            | 84                                            | 25        | 15         | 40        |
|                  |                                                | 130                                           | 18        | 12         |           |
| <b>Pyrraline</b> | 255                                            | 84                                            | 40        | 5          | 30        |
|                  |                                                | 148                                           | 25        | 10         |           |
|                  |                                                | 175                                           | 18        | 10         |           |
| <b>PI</b>        | 142                                            | 96                                            | 18        | 15         | 40        |
|                  |                                                | 114                                           | 14        | 15         |           |

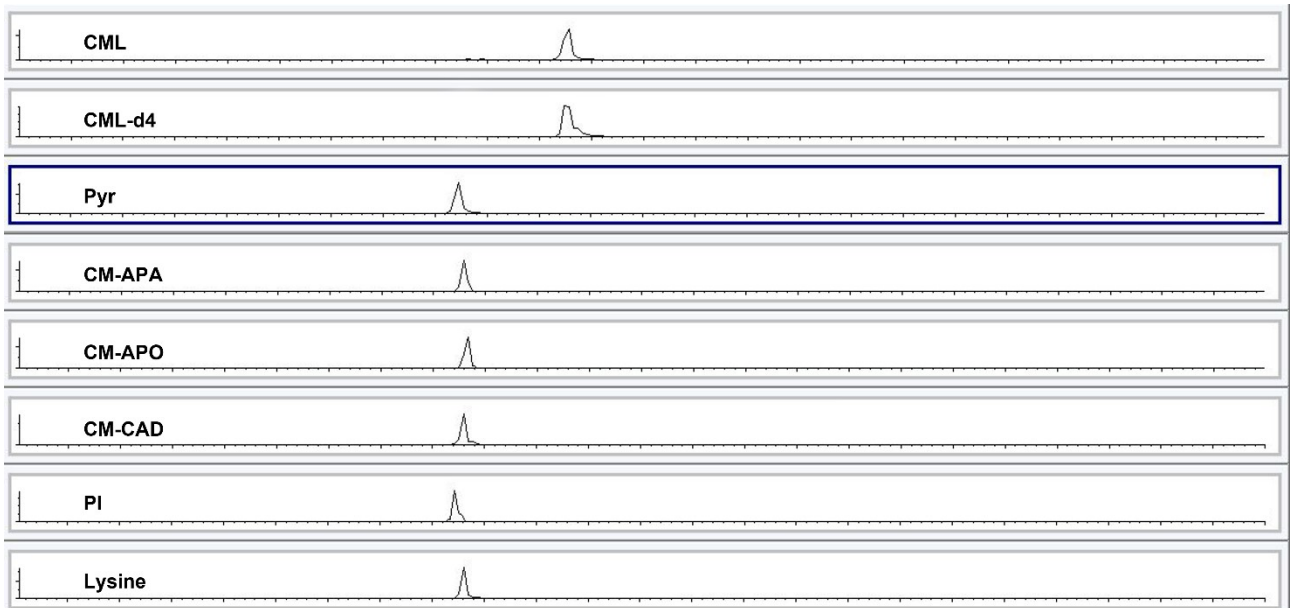

**Fig. S1.** Liquid chromatography–tandem mass spectrometry chromatograms in MRM mode showing the identification of CML, Pyrrolidine and CML metabolites.

**Table S2:** Spearman correlation between urinary CML and Lys, pyrraline and CML metabolites.

|                  | <b>CML</b>      |         |
|------------------|-----------------|---------|
|                  | Rho coefficient | P-value |
| <b>CM-APA</b>    | .619**          | .000    |
| <b>CM-APO</b>    | .676**          | .000    |
| <b>CM-CAD</b>    | .437**          | .002    |
| <b>PI</b>        | .358*           | .014    |
| <b>Lysine</b>    | .749**          | .000    |
| <b>Pyrraline</b> | .380**          | .009    |
